# Supplementary material for: Temperate Lianas Have More Acquisitive Strategies than Host Trees in Leaf and Stem Traits, but Not Root Traits
Source: MDPI journal article supplement (doi:10.3390/plants11243543), 2022-12-15
Supplement: s1 [file s1]

## Supplementary Materials

**Table S1.** Lianas and host tree species sampled in this study (BD: basal diameter, cm, DBH: Diameter at breast height, cm).

| Lianas                     |                 |      | Host trees                                     |             |      |
|----------------------------|-----------------|------|------------------------------------------------|-------------|------|
| Species                    | Family          | BD   | Species                                        | Family      | DBH  |
| <i>Actinidia chinensis</i> | Actinidiaceae   | 8.1  | <i>Quercus aliena</i> var. <i>acutiserrata</i> | Fagaceae    | 16.4 |
|                            |                 | 5.9  | <i>Celtis koraiensis</i>                       | Cannabaceae | 16.6 |
|                            |                 | 5.4  | <i>Acer davidii</i>                            | Sapindaceae | 12.1 |
|                            |                 | 7.5  | <i>Acer davidii</i>                            | Sapindaceae | 20.4 |
|                            |                 | 4.8  | <i>Quercus aliena</i> var. <i>acutiserrata</i> | Fagaceae    | 26.8 |
|                            |                 | 7.8  | <i>Quercus aliena</i> var. <i>acutiserrata</i> | Fagaceae    | 25.1 |
|                            |                 | 2.7  | <i>Acer stachyophyllum</i>                     | Sapindaceae | 13.0 |
| <i>Akebia trifoliata</i>   | Lardizabalaceae | 4.1  | <i>Quercus aliena</i> var. <i>acutiserrata</i> | Fagaceae    | 14.5 |
|                            |                 | 2.5  | <i>Quercus aliena</i> var. <i>acutiserrata</i> | Fagaceae    | 10.2 |
|                            |                 | 4.5  | <i>Quercus aliena</i> var. <i>acutiserrata</i> | Fagaceae    | 16.7 |
|                            |                 | 3.0  | <i>Quercus aliena</i> var. <i>acutiserrata</i> | Fagaceae    | 30.4 |
|                            |                 | 1.5  | <i>Quercus aliena</i> var. <i>acutiserrata</i> | Fagaceae    | 8.2  |
|                            |                 | 2.1  | <i>Quercus aliena</i> var. <i>acutiserrata</i> | Fagaceae    | 7.3  |
|                            |                 | 3.5  | <i>Quercus aliena</i> var. <i>acutiserrata</i> | Fagaceae    | 18.0 |
|                            |                 | 3.2  | <i>Quercus aliena</i> var. <i>acutiserrata</i> | Fagaceae    | 18.5 |
|                            |                 | 3.2  | <i>Quercus aliena</i> var. <i>acutiserrata</i> | Fagaceae    | 31.7 |
|                            |                 | 2.1  | <i>Quercus aliena</i> var. <i>acutiserrata</i> | Fagaceae    | 14.1 |
|                            |                 | 3.2  | <i>Acer davidii</i>                            | Sapindaceae | 10.7 |
|                            |                 | 3.5  | <i>Quercus aliena</i> var. <i>acutiserrata</i> | Fagaceae    | 15.7 |
|                            |                 | 2.4  | <i>Quercus aliena</i> var. <i>acutiserrata</i> | Fagaceae    | 9.5  |
|                            |                 | 2.9  | <i>Quercus aliena</i> var. <i>acutiserrata</i> | Fagaceae    | 27.0 |
|                            |                 | 0.8  | <i>Acer davidii</i>                            | Sapindaceae | 3.9  |
| <i>Celastrushypoleucus</i> | Celastraceae    | 13.0 | <i>Lindera obtusiloba</i>                      | Lauraceae   | 27.0 |
|                            |                 | 3.0  | <i>Quercus aliena</i> var. <i>acutiserrata</i> | Fagaceae    | 18.6 |
| <i>Celastrushypoleucus</i> | Celastraceae    | 6.8  | <i>Quercus aliena</i> var. <i>acutiserrata</i> | Fagaceae    | 14.5 |
|                            |                 | 8.4  | <i>Acer davidii</i>                            | Sapindaceae | 26.8 |
|                            |                 | 4.3  | <i>Acer davidii</i>                            | Sapindaceae | 20.7 |

|                                |                |     |                                                |             |      |
|--------------------------------|----------------|-----|------------------------------------------------|-------------|------|
|                                |                | 4.8 | <i>Quercus aliena</i> var. <i>acutiserrata</i> | Fagaceae    | 22.8 |
|                                |                | 6.4 | <i>Quercus aliena</i> var. <i>acutiserrata</i> | Fagaceae    | 40.2 |
|                                |                | 5.2 | <i>Quercus aliena</i> var. <i>acutiserrata</i> | Fagaceae    | 33.9 |
|                                |                | 3.4 | <i>Quercus aliena</i> var. <i>acutiserrata</i> | Fagaceae    | 21.4 |
|                                |                | 5.2 | <i>Quercus aliena</i> var. <i>acutiserrata</i> | Fagaceae    | 26.5 |
|                                |                | 6.2 | <i>Lindera obtusiloba</i>                      | Lauraceae   | 14.8 |
|                                |                | 3.9 | <i>Quercus mongolica</i>                       | Fagaceae    | 20.0 |
|                                |                | 5.4 | <i>Salix matsudana</i>                         | Salicaceae  | 32.0 |
|                                |                | 5.3 | <i>Betula albosinensis</i>                     | Betulaceae  | 30.1 |
|                                |                | 4.2 | <i>Betula albosinensis</i>                     | Betulaceae  | 18.0 |
|                                |                | 1.1 | <i>Populus purdomii</i>                        | Salicaceae  | 40.0 |
| <i>Schisandra sphenanthera</i> | Schisandraceae | 4.5 | <i>Quercus aliena</i> var. <i>acutiserrata</i> | Fagaceae    | 31.3 |
|                                |                | 3.5 | <i>Quercus aliena</i> var. <i>acutiserrata</i> | Fagaceae    | 30.8 |
|                                |                | 5.3 | <i>Quercus aliena</i> var. <i>acutiserrata</i> | Fagaceae    | 39.1 |
|                                |                | 3.8 | <i>Quercus aliena</i> var. <i>acutiserrata</i> | Fagaceae    | 33.0 |
|                                |                | 3.5 | <i>Quercus aliena</i> var. <i>acutiserrata</i> | Fagaceae    | 13.4 |
|                                |                | 5.6 | <i>Quercus aliena</i> var. <i>acutiserrata</i> | Fagaceae    | 37.9 |
|                                |                | 4.9 | <i>Quercus aliena</i> var. <i>acutiserrata</i> | Fagaceae    | 37.6 |
|                                |                | 2.6 | <i>Acer davidii</i>                            | Sapindaceae | 13.9 |
|                                |                | 2.8 | <i>Quercus aliena</i> var. <i>acutiserrata</i> | Fagaceae    | 23.3 |
|                                |                | 4.3 | <i>Quercus aliena</i> var. <i>acutiserrata</i> | Fagaceae    | 22.0 |
|                                |                | 3.5 | <i>Quercus aliena</i> var. <i>acutiserrata</i> | Fagaceae    | 30.8 |
|                                |                | 5.6 | <i>Populus purdomii</i>                        | Salicaceae  | 31.0 |
|                                |                | 3.5 | <i>Quercus aliena</i> var. <i>acutiserrata</i> | Fagaceae    | 21.9 |
|                                |                | 3.8 | <i>Quercus aliena</i> var. <i>acutiserrata</i> | Fagaceae    | 26.0 |
|                                |                | 3.9 | <i>Acer davidii</i>                            | Sapindaceae | 17.8 |
|                                |                | 2.6 | <i>Quercus aliena</i> var. <i>acutiserrata</i> | Fagaceae    | 42.6 |
| <i>Vitis piasezkii</i>         | Vitaceae       | 9.7 | <i>Quercus aliena</i> var. <i>acutiserrata</i> | Fagaceae    | 29.2 |
|                                |                | 9.2 | <i>Padus avium</i>                             | Rosaceae    | 23.6 |
|                                |                | 4.3 | <i>Fraxinus chinensis</i>                      | Oleaceae    | 13.4 |
|                                |                | 3.5 | <i>Salix matsudana</i>                         | Salicaceae  | 51.0 |
|                                |                | 5.1 | <i>Prunus polytricha</i>                       | Rosaceae    | 14.0 |
|                                |                | 5.3 | <i>Salix matsudana</i>                         | Salicaceae  | 25.0 |
|                                |                | 2.9 | <i>Populus purdomii</i>                        | Salicaceae  | 25.2 |

---

**Table S2.** Differences in slope and shifts in elevation (intercept) between all sampled lianas ( $n = 61$ ) and trees ( $n = 61$ ).

| Traits          |      | Slope        |              | Elevation   |             |
|-----------------|------|--------------|--------------|-------------|-------------|
| X               | Y    | Lianas       | Trees        | Lianas      | Trees       |
| L <sub>th</sub> | LA   | 1.92         | -3.43        | 4.97        | -4.63       |
| L <sub>th</sub> | LDMC | -1.09        | 0.52         | -2.53       | 0.59        |
| L <sub>th</sub> | LCC  | 0.24         | -0.34        | 3.01        | 1.99        |
| L <sub>th</sub> | WD   | -0.51        | 0.61         | -3.12       | -0.98       |
| L <sub>th</sub> | SRL  | -0.72        | -1.47        | 1.01        | -0.5        |
| LA              | LDMC | -0.57        | -0.15        | 0.26        | 0.12        |
| LA              | LNC  | 0.27         | 0.27         | <b>0.97</b> | <b>0.95</b> |
| LA              | LCC  | 0.12         | 0.11         | 2.4         | 2.45        |
| LA              | WD   | 0.26         | 0.18         | -2.64       | -2.47       |
| LDMC            | LMA  | 0.43         | 1.96         | -2.11       | -1.49       |
| LDMC            | SLA  | <b>-0.44</b> | <b>-1.95</b> | 2.11        | 1.31        |
| LDMC            | LNC  | 0.48         | -1.79        | 1.69        | 0.73        |
| LDMC            | LCC  | 0.22         | 0.65         | 2.73        | 2.9         |
| LDMC            | WD   | 0.46         | 1.15         | -1.95       | -1.66       |
| LMA             | SLA  | -1.02        | -0.99        | -0.04       | 0.01        |
| LMA             | LNC  | 1.12         | -0.91        | 4.05        | -0.63       |
| LMA             | LCC  | 0.5          | -0.33        | 3.78        | 1.89        |
| LMA             | WD   | 1.08         | -0.59        | 0.33        | -3.48       |
| SLA             | LNC  | -1.1         | 0.92         | 4.01        | -0.64       |
| SLA             | LCC  | -0.49        | -0.33        | 3.76        | 1.88        |
| SLA             | WD   | -1.06        | 0.59         | 0.29        | -3.48       |
| SLA             | RCC  | -0.46        | -0.49        | 3.71        | 3.75        |
| LNC             | LCC  | 0.45         | 0.36         | <b>1.97</b> | <b>2.11</b> |
| LNC             | WD   | <b>0.96</b>  | <b>0.65</b>  | -3.58       | -3.3        |
| LNC             | RNC  | -1.37        | -1.57        | 3.17        | 3.54        |
| LCC             | WD   | 2.16         | 1.79         | -7.82       | -6.84       |
| RNC             | RCC  | 0.31         | 0.34         | 2.23        | 2.2         |

**Note:** Significant differences ( $P < 0.05$ ) are indicated by the superscripts and marked in bold. For explanation of abbreviations, see Table 1.

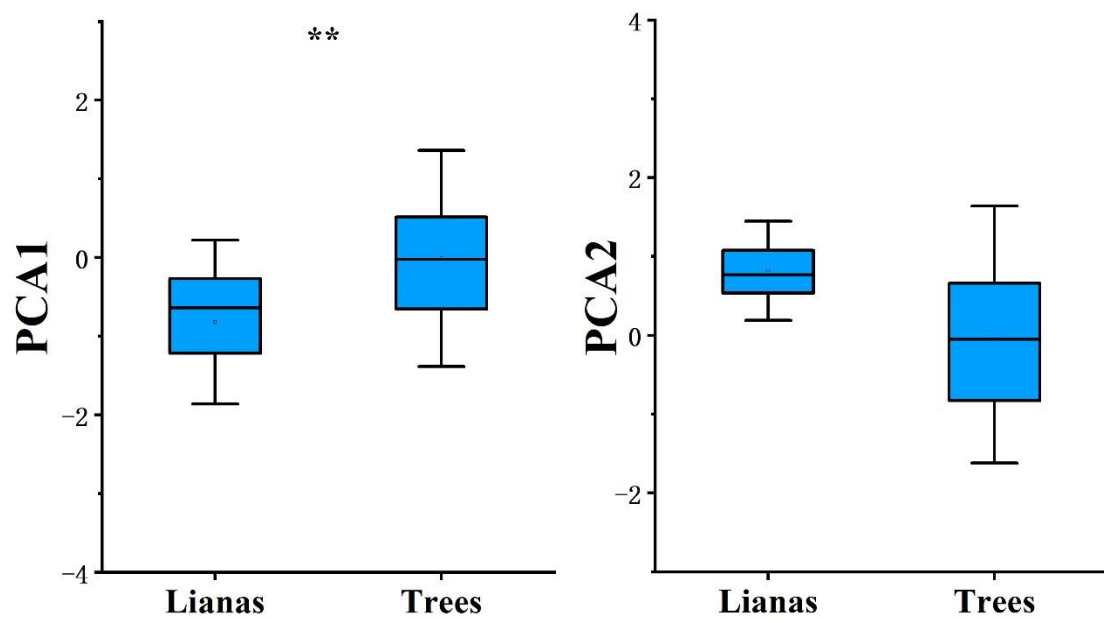

**Figure S1.** Differences between lianas and host trees in the first and second component scores for the forest. Asterisks indicate statistically significant difference between lianas and host trees at  $\alpha < 0.001$ .
